# Supplementary material for: Association between Eating Speed and Classical Cardiovascular Risk Factors: A Cross-Sectional Study
Source: PubMed Central journal article supplement (PMC6356451; doi:10.3390/nu11010083), 2019-01-04
Supplement: nutrients-11-00083-s001.pdf [file nutrients-11-00083-s001.pdf]

## Supplementary file

**Table S1.** Hazard ratio (95% IC) of different cardiovascular risk factors for self-reported eating speed categories

|                                      | Eating Speed Categories |                          |                        |
|--------------------------------------|-------------------------|--------------------------|------------------------|
|                                      | Slow<br><i>n</i> = 181  | Medium<br><i>n</i> = 251 | Fast<br><i>n</i> = 360 |
| Obesity % ( <i>n</i> )               | 41.4 (75)               | 41 (103)                 | 50.6 (182)             |
| Crude model                          | 1 (Ref.)                | 0.99 (0.79–1.24)         | 1.22 (1.00–1.49)       |
| Adjusted model <sup>a</sup>          | 1 (Ref.)                | 1.00 (0.80–1.24)         | 1.15 (0.94–1.41)       |
| Metabolic syndrome % ( <i>n</i> )    | 59.70 (108)             | 61.00 (153)              | 64.40 (232)            |
| Crude model                          | 1 (Ref.)                | 1.02 (0.88–1.19)         | 1.08 (0.94–1.24)       |
| Adjusted model <sup>b</sup>          | 1 (Ref.)                | 1.02 (0.88–1.18)         | 0.99 (0.86–1.14)       |
| <b>Metabolic syndrome components</b> |                         |                          |                        |
| Central obesity % ( <i>n</i> )       | 74.60 (135)             | 74.10 (186)              | 78.90 (284)            |
| Crude model                          | 1 (Ref.)                | 0.99 (0.89–1.11)         | 1.06 (0.95–1.17)       |
| Adjusted model <sup>c</sup>          | 1 (Ref.)                | 1.00 (0.91–1.10)         | 0.95 (0.87–1.04)       |
| Hypertriglyceridemia % ( <i>n</i> )  | 21.60 (39)              | 29.10 (73)               | 34.20 (123)            |
| Crude model                          | 1 (Ref.)                | 1.35 (0.97–1.89)         | 1.59 (1.16–2.17)       |
| Adjusted model <sup>c</sup>          | 1 (Ref.)                | 1.36 (0.99–1.86)         | 1.55 (1.15–2.08)       |
| Low HDL-C % ( <i>n</i> )             | 22.10 (40)              | 21.10 (53)               | 23.90 (86)             |
| Crude model <sup>*</sup>             | 1 (Ref.)                | 0.96 (0.67–1.37)         | 1.08 (0.78–1.50)       |
| Adjusted model <sup>c</sup>          | 1 (Ref.)                | 0.92 (0.66–1.28)         | 0.88 (0.65–1.18)       |
| High Blood Pressure % ( <i>n</i> )   | 96.10 (174)             | 95.60 (240)              | 96.40 (347)            |
| Crude model                          | 1 (Ref.)                | 0.99 (0.96–1.03)         | 1.00 (0.97–1.04)       |
| Adjusted model <sup>c</sup>          | 1 (Ref.)                | 0.99 (0.96–1.03)         | 1.00 (0.97–1.03)       |
| High fasting glucose % ( <i>n</i> )  | 65.20 (118)             | 65.70 (165)              | 61.10 (220)            |
| Crude model                          | 1 (Ref.)                | 1.01 (0.88–1.16)         | 0.94 (0.82–1.07)       |
| Adjusted model <sup>c</sup>          | 1 (Ref.)                | 1.00 (0.87–1.15)         | 0.93 (0.81–1.07)       |

Abbreviations: CI, confidence interval.

Cox regression models were applied with robust estimates of the variance to correct for intra-cluster correlation

<sup>a</sup> Model adjusted for sex (female or male), age (years), educational level (low-medium and high), smoking (current, former, or never), total energy intake, physical activity, oral prosthesis use (yes or no), alcohol consumption (g/d), MedDiet Adherence (low or high), high blood pressure (yes or no), and high fasting glucose (yes or no).

<sup>b</sup> Model 2 adjusted for variables from model 1 except for high blood pressure (yes or no) and high fasting glucose (yes or no). Additionally adjusted by BMI.

<sup>c</sup> Model 3 adjusted for variables from model 2 plus the other four metabolic syndrome individual components.
